# Supplementary material
Source: PubMed Central journal article supplement (PMC6668926)
Supplement: NIHMS1531921-supplement-Supplementary.pdf [file NIHMS1531921-supplement-Supplementary.pdf]

Genome of the Komodo dragon reveals adaptations in the cardiovascular and chemosensory systems of monitor lizards

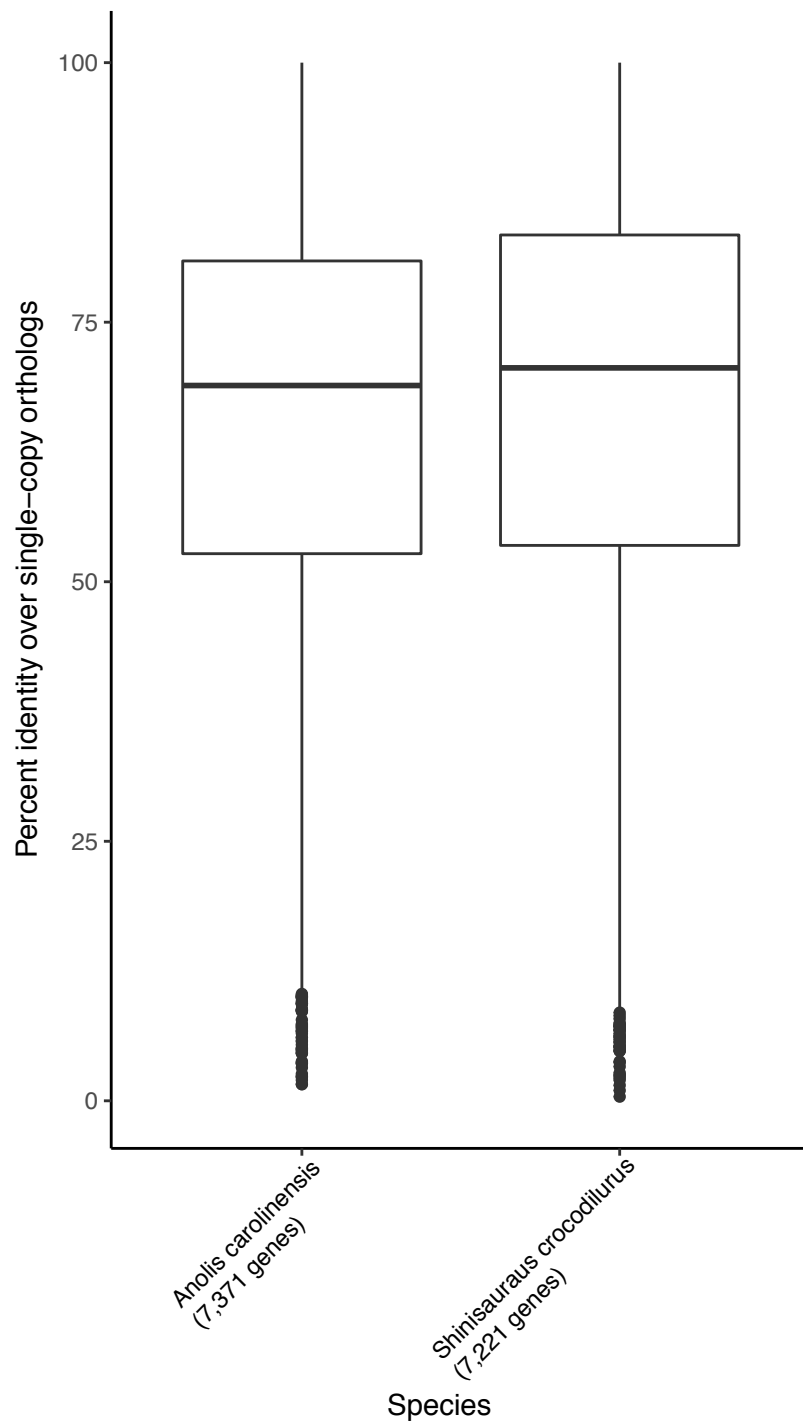

Figure S1. Percent identities of single-copy orthologs between the Komodo dragon and the green anole and the Komodo dragon and the Chinese crocodile lizard.

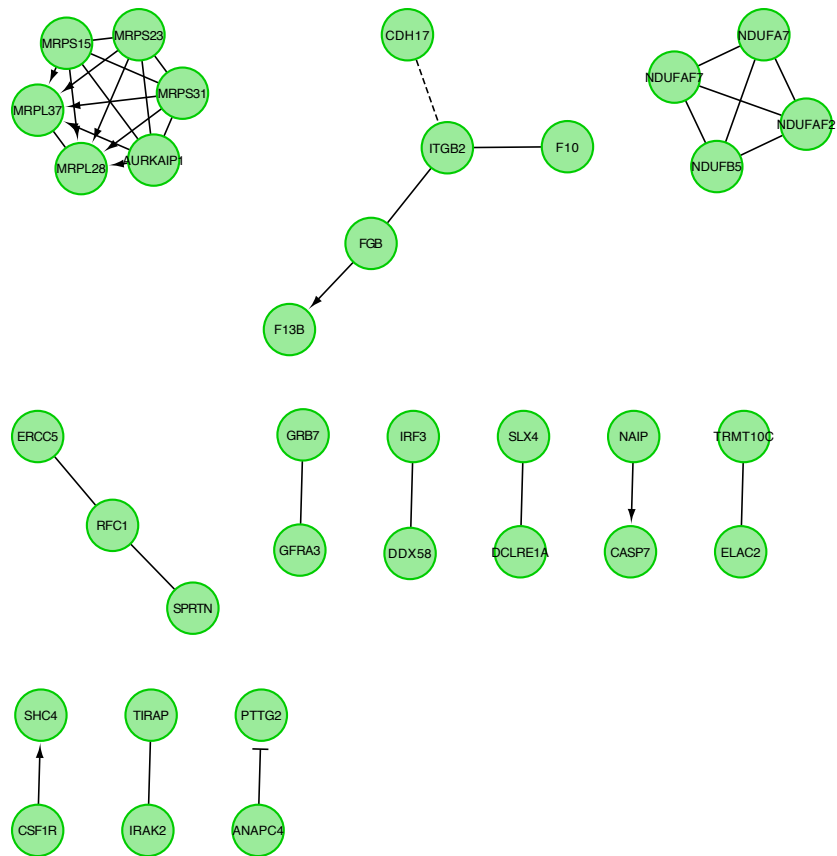

Figure S2. Network of positively selected genes with functional interactions as determined by Reactome FIViz.

**Title:** Electron Transport Chain (OXPHOS system in mitochondria)  
**Organism:** Homo sapiens

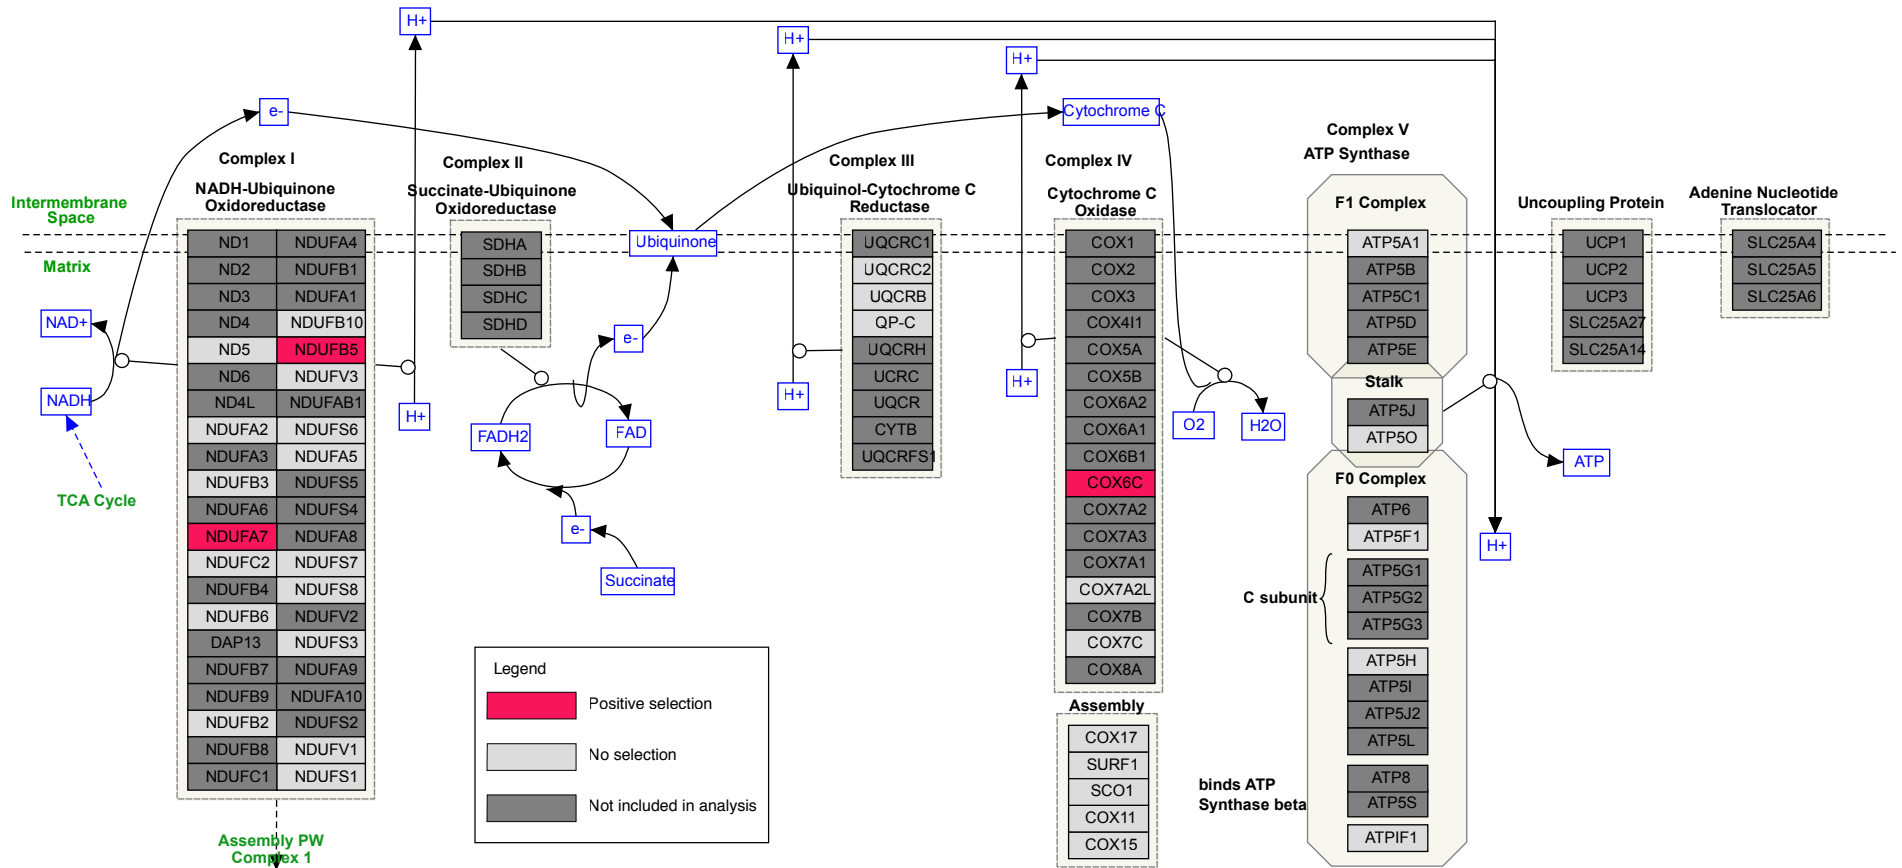

Figure S3. Positive selection on genes encoding structural proteins in the electron transport chain. Dark gray genes were not tested for positive selection due to either missing data in one or more species or difficulty resolving ortholog/paralog relationships. Pink genes have signatures of positive selection, and light gray genes did not have signatures of positive selection. Figure modified from WikiPathways.

Table S1. Genome statistics and sources for non-avian reptiles used in this study.

| Species scientific name           | Species common name      | Assembly size (Gb) | GC content (%) | Protein-c | Source     | Accession           |
|-----------------------------------|--------------------------|--------------------|----------------|-----------|------------|---------------------|
| <i>Varanus komodoensis</i>        | Komodo dragon            | 1.51               | 44.04          | 18,462    | This study | This study          |
| <i>Shinisaurus crocodilurus</i>   | Chinese crocodile lizard | 2.24               | 44.46          | 20,150    | GigaDB     | DOI: 10.5524/100315 |
| <i>Ophisaurus gracilis</i>        | Burmese glass lizard     | 1.78               | 43.71          | 19,513    | GigaDB     | DOI: 10.5524/100119 |
| <i>Pogona vitticeps</i>           | Australian dragon lizard | 1.82               | 41.81          | 21,994    | NCBI       | GCF_900067755.1     |
| <i>Anolis carolinensis</i>        | Green anole              | 1.78               | 40.32          | 22,293    | NCBI       | GCF_000090745.1     |
| <i>Python molurus bivittatus</i>  | Burmese python           | 1.44               | 39.61          | 20,240    | NCBI       | GCF_000186305.1     |
| <i>Eublepharis macularius</i>     | Leopard gecko            | 2.02               | 43.55          | 24,755    | GigaDB     | DOI: 10.5524/100246 |
| <i>Gekko japonicus</i>            | Japanese gecko           | 2.55               | 45.47          | 21,971    | NCBI       | GCF_001447785.1     |
| <i>Crocodylus porosus</i>         | Saltwater crocodile      | 2.12               | 43.90          | 19,551    | NCBI       | GCF_001723895.1     |
| <i>Pelodiscus sinensis</i>        | Chinese softshell turtle | 2.21               | 44.41          | 21,900    | NCBI       | GCF_000230535.1     |
| <i>Chelonia mydas</i>             | Green sea turtle         | 2.24               | 43.48          | 19,575    | NCBI       | GCF_000344595.1     |
| <i>Alligator mississippiensis</i> | American alligator       | 2.17               | 44.29          | 25,279    | NCBI       | GCF_000281125.3     |
| <i>Alligator sinensis</i>         | Chinese alligator        | 2.30               | 44.49          | 22,381    | NCBI       | GCF_000455745.1     |
| <i>Chrysemys picta bellii</i>     | Western painted turtle   | 2.59               | 44.19          | 24,740    | NCBI       | GCF_000241765.3     |
| <i>Gavialis gangeticus</i>        | Indian gharial           | 2.88               | 43.94          | 18,887    | NCBI       | GCF_001723915.1     |

Table S2. Repetitive elements in Komodo.

| Repeat type                 | Number of elements | Length occupied | Percentage of sequence |
|-----------------------------|--------------------|-----------------|------------------------|
| SINEs:                      | 228529             | 26019684 bp     | 1.72%                  |
| -ALUs                       | 0                  | 0 bp            | 0.00%                  |
| -MIRs                       | 86618              | 9611722 bp      | 0.64%                  |
| LINEs:                      | 724347             | 202613692 bp    | 13.43%                 |
| -LINE1                      | 38583              | 14006748 bp     | 0.93%                  |
| -LINE2                      | 294549             | 68579729 bp     | 4.55%                  |
| -L3/CR1                     | 255901             | 72214163 bp     | 4.79%                  |
| LTR_elements:               | 42768              | 16998342 bp     | 1.13%                  |
| -ERV_L                      | 0                  | 0 bp            | 0.00%                  |
| -ERV_L-MaLRs                | 0                  | 0 bp            | 0.00%                  |
| -ERV_classI                 | 5934               | 2798550 bp      | 0.19%                  |
| -ERV_classII                | 362                | 300979 bp       | 0.02%                  |
| DNA_elements:               | 374603             | 53497854 bp     | 3.55%                  |
| -hAT-Charlie                | 60163              | 13443390 bp     | 0.89%                  |
| -TcMar-Tigger               | 28482              | 6519272 bp      | 0.43%                  |
| Unclassified:               | 883265             | 166908695 bp    | 11.07%                 |
| Total_interspersed_repeats: |                    | 466038267 bp    | 30.90%                 |
| Small_RNA:                  | 11639              | 837637 bp       | 0.06%                  |
| Satellites:                 | 8940               | 752582 bp       | 0.05%                  |
| Simple_repeats:             | 420254             | 15381445 bp     | 1.02%                  |
| Low_complexity:             | 50016              | 2338271 bp      | 0.16%                  |
| Total repeats               |                    | 485348202 bp    | 32.18%                 |

Table S3. Universal single copy genes in reptile genomes (BUSCO: vertebrata set)

| <b>Species</b>           | <b>Single-copy<br/>BUSCO</b> | <b>Duplicated<br/>BUSCO</b> | <b>Fragmented<br/>BUSCO</b> | <b>Missing<br/>BUSCO</b> | <b>Total number<br/>BUSCOs</b> |
|--------------------------|------------------------------|-----------------------------|-----------------------------|--------------------------|--------------------------------|
| American alligator       | 96.10%                       | 0.70%                       | 2.20%                       | 1.00%                    | 2586                           |
| Australian dragon lizard | 94.30%                       | 0.60%                       | 3.10%                       | 2.00%                    | 2586                           |
| Burmese glass lizard     | 94.70%                       | 0.70%                       | 2.80%                       | 1.80%                    | 2586                           |
| Burmese python           | 91.00%                       | 0.70%                       | 5.40%                       | 2.90%                    | 2586                           |
| Chinese alligator        | 94.40%                       | 0.70%                       | 3.20%                       | 1.70%                    | 2586                           |
| Chinese crocodile lizard | 91.60%                       | 0.90%                       | 4.80%                       | 2.70%                    | 2586                           |
| Chinese softshell turtle | 93.50%                       | 0.50%                       | 3.80%                       | 2.20%                    | 2586                           |
| Green anole              | 88.10%                       | 0.80%                       | 5.60%                       | 5.50%                    | 2586                           |
| Green sea turtle         | 93.90%                       | 0.80%                       | 3.80%                       | 1.50%                    | 2586                           |
| Indian gharial           | 91.70%                       | 0.50%                       | 3.50%                       | 4.30%                    | 2586                           |
| Japanese gecko           | 89.80%                       | 1.10%                       | 6.30%                       | 2.80%                    | 2586                           |
| Komodo dragon            | 95.70%                       | 0.40%                       | 2.00%                       | 1.90%                    | 2586                           |
| Leopard gecko            | 94.00%                       | 1.20%                       | 3.30%                       | 1.50%                    | 2586                           |
| Saltwater crocodile      | 94.10%                       | 0.60%                       | 2.10%                       | 3.20%                    | 2586                           |
| Western painted turtle   | 95.20%                       | 0.70%                       | 2.60%                       | 1.50%                    | 2586                           |

**Table S6.** Number of reads, positions and scaffolds assigned to chromosomes

| <b>Chromosome</b> | <b>No. of total reads</b> | <b>No. of total positions</b> | <b>No. of total scaffold</b> | <b>Total length of assigned scaffolds (bp)</b> |
|-------------------|---------------------------|-------------------------------|------------------------------|------------------------------------------------|
| Chr1              | 2,325,629                 | 502,804                       | 94                           | 245,019,529                                    |
| Chr2              | 10,010,878                | 1,032,999                     | 14                           | 156,023,568                                    |
| Chr3              | 3,921,580                 | 458,921                       | 11                           | 115,571,927                                    |
| Chr4              | 1,645,424                 | 491,065                       | 39                           | 117,170,416                                    |
| Chr5              | 1,130,763                 | 121,596                       | 6                            | 75,951,376                                     |
| Chr6, 7, 8        | 8,726,785                 | 1,442,537                     | 25                           | 200,178,831                                    |
| Chr9, 10          | 485,383                   | 131,769                       | 8                            | 69,008,218                                     |
| Chr11, 12         | 497,393                   | 107,230                       | 6                            | 52,491,606                                     |
| Chr13             | 231,907                   | 48,372                        | 9                            | 19,625,567                                     |
| Chr14             | 213,215                   | 21,088                        | 3                            | 21,537,982                                     |
| Chr15             | 215,482                   | 58,565                        | 4                            | 14,821,201                                     |
| Chr16             | 283,123                   | 17,245                        | 2                            | 13,367,238                                     |
| Chr17, 18         | 414,067                   | 61,220                        | 10                           | 17,262,365                                     |
| Chr19             | 168,685                   | 36,954                        | 6                            | 11,765,548                                     |
| ChrZ              | 414,067                   | 61,220                        | 6                            | 10,642,498                                     |

No. of total positions: Total number of positions on scaffolds assigned to a given chromosome. A position being the sequence resulting by the merging of all reads that are consecutively aligned on a specific section of a scaffold



Table S7. V1R and V2R genes across reptiles.

| <b>Species</b>           | <b>V1R genes</b> | <b>V2R genes</b> |
|--------------------------|------------------|------------------|
| Komodo dragon            | 0                | 129              |
| Chinese crocodile lizard | 1                | 195              |
| Burmese glass lizard     | 1                | 58               |
| Australian dragon lizard | 0                | 71               |
| Green anole              | 0                | 53               |
| Burmese python           | 0                | 114              |
| Leopard gecko            | 1                | 254              |
| Japanese gecko           | 0                | 150              |
| Chinese softshell turtle | 0                | 1                |
| Western painted turtle   | 1                | 2                |
| Green sea turtle         | 1                | 0                |
| American alligator       | 1                | 0                |
| Chinese alligator        | 1                | 0                |
| Indian gharial           | 0                | 0                |
| Saltwater crocodile      | 1                | 0                |
